# Supplementary material for: The State of the Evidence about the Family and Community Nurse: A Systematic Review
Source: MDPI journal article supplement (doi:10.3390/ijerph19074382), 2022-04-06
Supplement: s1 [file s1]

**Table S1.** Synthesis of the main characteristics of 90 included articles.

| First author and year of publication | Title                                                                             | Aim                                                                                                                                                                                      | Study design          | Population                        | Country | Theme                                   | Results                                                                                                                                                                                                                                                                                                                                             |
|--------------------------------------|-----------------------------------------------------------------------------------|------------------------------------------------------------------------------------------------------------------------------------------------------------------------------------------|-----------------------|-----------------------------------|---------|-----------------------------------------|-----------------------------------------------------------------------------------------------------------------------------------------------------------------------------------------------------------------------------------------------------------------------------------------------------------------------------------------------------|
| 1 Adamson E. (2013)                  | A “good death” at home: FCNs helping to make it possible                          | To discuss the results of recent research (Cruickshank et al, 2010), illustrating the central role that FCNs in the choice to die at home                                                | Discussion paper      | FCNs                              | UK      | Clinical practice                       | FCNs play a key role in ensuring the respect and dignity of patients in palliative care, in particular to support patients and their families in the process of accompanying death.                                                                                                                                                                 |
| 2 Adderley J. (2015)                 | FCNs’ judgement for the management of venous leg ulceration: A judgement analysis | 1. To evaluate the accuracy of diagnostic and therapeutic judgments in relation to high compression.<br>2. To explore the use of available information tools for diagnosis and treatment | Cross sectional study | FCNs                              | UK      | Clinical practice                       | FNCs are tasked with preventing and treating numerous chronic conditions at home, including leg ulcers. In this field, clinical judgments and decisions they are complex and uncertain and may be affected by a certain variability in the judgment and interpretation of information.                                                              |
| 3 Aldridge A. (2014)                 | The role of the FCN in psoriatic comorbidities interventions                      | To describe psoriatic comorbidities and its impact on patients and the role of FCN                                                                                                       | Discussion paper      | Patients affected by psoriasis    | UK      | Clinical practice and core competencies | The FCN must be able to recognize the signs and symptoms of the disease and promote a healthier lifestyle for patients with psoriasis. This change requires the nurses to have good communication skills and to be persistent. to allow                                                                                                             |
| 4 Andrews N. (2021)                  | FCNs’ support for patients with fibromyalgia who use cannabis to manage pain      | To provide information to FCNs on how cannabis use affects the experience of pain for people living with FM                                                                              | Discussion paper      | Patients affected by fibromyalgia | UK      | Clinical practice                       | the patient to 'own' the change. People with fibromyalgia have their own experience of pain that does not always find relief in traditional therapies. The use of cannabis is a viable alternative with excellent results for these patients and it is important that FCNs deepen their knowledge in this regard to provide adequate and safe care. |
| 5 Bagnasco A. (2020)                 | A European e-Delphi study to identify the fundamental skills for the              | To identify core competencies of FCN                                                                                                                                                     | Qualitative study     | FCNs                              | Europe  | Core competencies                       | From this study, which was born among the partners of the ENhANCE project, 27 core competences are defined that an FNC should have.                                                                                                                                                                                                                 |

|    |                    |                                                                                                                                                              |                                                                                                                                                                                                  |                            |                              |             |                                                           |                                                                                                                                                                                                                                                                                                                                                 |  |
|----|--------------------|--------------------------------------------------------------------------------------------------------------------------------------------------------------|--------------------------------------------------------------------------------------------------------------------------------------------------------------------------------------------------|----------------------------|------------------------------|-------------|-----------------------------------------------------------|-------------------------------------------------------------------------------------------------------------------------------------------------------------------------------------------------------------------------------------------------------------------------------------------------------------------------------------------------|--|
|    |                    | definition of the training path of the FCN                                                                                                                   |                                                                                                                                                                                                  |                            |                              |             |                                                           |                                                                                                                                                                                                                                                                                                                                                 |  |
| 6  | Balestra M. (2019) | Family Nurse Practitioner Scope of Practice Issues When Treating Patients With Mental Health Issues                                                          | 1. To outline the different scope of practice for nurses working with patients with mental health issues<br>2. To provide recommendations to help them ensure best practices and patient safety. | Discussion paper           | Patients with mental disease | USA         | Clinical practice                                         | The article addresses the issue of home management of patients with mental disorders by identifying the necessary skills and underlining the importance of being aware of the limits of one's work. Violations of one's own competences or scope of action can lead to civil liability and disciplinary action.                                 |  |
| 7  | Bidone S. (2021)   | Evaluation of self-perceived competence among FCNs who attained the Master's Degree at the University of Eastern Piedmont (2013-2019): An exploratory survey | To evaluate the perceived preparation by nurses who have obtained a master's degree in FCN at the University of Piemonte Orientale                                                               | Cross sectional study      | FCNs                         | Italy       | Core competencies, Outcomes and Advanced training program | The course is divided into learning units, corresponding to the theoretical and practical requirements of the FNC who has found a high level of skills in individual care, while recording much lower levels for community care, especially in defining short- and long-term outcomes and in promoting improvements in lifestyles.              |  |
| 8  | Bright T. (2019)   | Smoking cessation and the health promotion role of FCNs                                                                                                      | To discuss the health-promoting role of a nursing student during the coaching in a community nursing team                                                                                        | A case study               | A smoker patient             | UK          | Clinical practice and Core competencies                   | The literature shows that PHC is the primary area where FCN feels best represented in its key role, including the goal of smoking cessation. Understanding the patient's point of view is essential to effectively involve them in the care process.                                                                                            |  |
| 9  | Broekema S. (2020) | Effects of FCN conversations on families in home health care: A controlled before-and-after study                                                            | To assess the effects of FCNs conversations on family caregiver burden, patients' quality of life, family functioning and the amount of professional home health care                            | A quasi-experimental study | Patients and their families  | Netherlands | Outcomes                                                  | The study shows that for the group followed by the FCN there was a significant increase in family functioning compared to the control group, while it did not reveal any significant benefits on the patients' quality of life. health care remained unchanged in the control group while it significantly decreased in the intervention group. |  |
| 10 | Cavada L. (2021)   | The implementation of family nursing in a municipality                                                                                                       | To describe the contents and the learning proposed with specific training and testing of a pilot                                                                                                 | Discussion paper           | FCNs                         | Italy       | Organizational and educational                            | Calgary model is a family assessment model and takes into account three dimensions of the family: structural, developmental and functional.                                                                                                                                                                                                     |  |

|    |                            |                                                                                         |                                                                                                                                                                                                            |                       |                                                      |             |                                                                                                                |                                                                                                                                                                                                                                                                                                                                                                                                                                                                                                            |
|----|----------------------------|-----------------------------------------------------------------------------------------|------------------------------------------------------------------------------------------------------------------------------------------------------------------------------------------------------------|-----------------------|------------------------------------------------------|-------------|----------------------------------------------------------------------------------------------------------------|------------------------------------------------------------------------------------------------------------------------------------------------------------------------------------------------------------------------------------------------------------------------------------------------------------------------------------------------------------------------------------------------------------------------------------------------------------------------------------------------------------|
|    | of the Province of Bolzano | project on insertion of three family nurses in mountain.                                |                                                                                                                                                                                                            |                       |                                                      | onal models | The assessment of the FCN is guided by questions that evaluate the cognitive, affective and behavioral domain. |                                                                                                                                                                                                                                                                                                                                                                                                                                                                                                            |
| 11 | Chambrlain V. (2016)       | Patients with inflammatory arthritis: an opportunity for FCNs                           | To give FCNs an overview of the condition, including signs and symptoms, diagnosis and medication while helping to identify ways in which they might be able to become more involved in their direct care. | Discussi on paper     | Patients with arthritis                              | UK          | Clinical practice                                                                                              | FCNs should be prepared about the correct use of analgesia and the evaluation of its effects, as well as with conventional and non-conventional pain treatments for patients with arthritis.                                                                                                                                                                                                                                                                                                               |
| 12 | Chamorro A. (2014)         | The family and FCN: health agent and model for the chronic patient within the community | To describe, analyze and correct the factors that limit professional growth and the supply of a portfolio of FCN services in Spain                                                                         | Discussi on paper     | FCNs                                                 | Spain       | Core competencies                                                                                              | FCNs had to implement strategies that promote continuity and quality of care, evaluate the impact of care by defining process indicators and results, have sufficient human and materials resources. The reduction of antibiotic resistance can be reduced through proper prescription management. The prescribing nurse must guide his or her decisions in terms of capacity, opportunity and motivation. He must therefore have good communication skills and knowledge to deal with patient resistance. |
| 13 | Chater A. (2019)           | FCN and antibiotic stewardship: the importance of communication and training            | To enlighten effects of excessive use of antibiotic therapy and identify the role of FCN                                                                                                                   | Discussi on paper     | A 35-year-old male patient                           | UK          | Clinical practice and Core competencies                                                                        | Health promotion and prevention of acute events, including cerebrovascular events, are among the key activities of FCNs. For this purpose, FCNs can work in multidisciplinary teams with the role of case manager. starting from the understanding of patients' needs, they can develop prevention, counseling and treatment actions.                                                                                                                                                                      |
| 14 | Clare C.S. (2017)          | The role of FCNs in stroke prevention                                                   | To describe stroke epidemiological data, risk factors and prevention interventions highlighting the role that FCNs can have in primary prevention                                                          | Discussi on paper     | A patient admitted to hospital after a potential TIA | UK          | Clinical practice                                                                                              | FCNs needed to be trained about end-of-life care. This could help the preservation of the patient's dignity, that could be not underestimated and to let FCNs be capable of caring                                                                                                                                                                                                                                                                                                                         |
| 15 | Connolly M. (2018)         | Evaluating an educational programme for dignity care intervention with FCNs in Ireland  | To present the results of an evaluation of a palliative care education programme targeted on Dignity Care Intervention                                                                                     | Cross sectional study | Public health nurses and registered                  | Ireland     | Advanced training program                                                                                      |                                                                                                                                                                                                                                                                                                                                                                                                                                                                                                            |

|    |                     |                                                                                                                                       |                                                                                                                                                                                               |                       |                                                                              |             |                                                                                                                                                                                                                                                                                                                                                          |
|----|---------------------|---------------------------------------------------------------------------------------------------------------------------------------|-----------------------------------------------------------------------------------------------------------------------------------------------------------------------------------------------|-----------------------|------------------------------------------------------------------------------|-------------|----------------------------------------------------------------------------------------------------------------------------------------------------------------------------------------------------------------------------------------------------------------------------------------------------------------------------------------------------------|
|    |                     | (DCI) Ireland for FCNs                                                                                                                |                                                                                                                                                                                               | general nurses        |                                                                              |             | patients and their families at home.                                                                                                                                                                                                                                                                                                                     |
|    |                     |                                                                                                                                       |                                                                                                                                                                                               |                       |                                                                              |             | FCN skills development enabled the nurse to become a prescriber through a ten-day training program after six months of field experience.                                                                                                                                                                                                                 |
| 16 | Courtenay M. (2018) | Community nurse prescribing                                                                                                           | To describe the state of the art of prescribing FCNs in the UK                                                                                                                                | Discussion paper      | FCN prescribers                                                              | UK          | Clinical practice and Advanced training program<br>However, their number is decreasing, and, to date, there are around 36,000. The main cause seems to be the number and type of drugs that they are allowed to pre-write, which does not allow adequate prescriptions.                                                                                  |
| 17 | Cramm J.M. (2017)   | Self-management abilities and quality of life among frail community-dwelling individuals: the role of FCNs in the Netherlands         | To determine whether Dutch FCNs improve the self-management and quality of life of fragile people in their communities                                                                        | Longitudinal study    | Elderly patients                                                             | Netherlands | Outcomes<br>The provision of care by FCN to frail people living in communities in Rotterdam produced a significant advantage in improving the quality of life and clinical outcomes especially in relation to self-management skills, as well as in general behavior.                                                                                    |
| 18 | Daly B. (2015)      | Promoting good dental health in older people: role of the FCN                                                                         | To describe the characteristics of oral health in the elderly and supportive interventions to be implemented in residential care facilities                                                   | Discussion paper      | Older patients                                                               | UK          | Clinical practice<br>The literature shows that PHC is the primary area where FCN feels best represented in its key role. Among other challenges, FCNs are also engaged in promoting oral hygiene                                                                                                                                                         |
| 19 | Davis W.A. (2013)   | Determinant and costs of community nursing FCN type 2 diabetes from community based observational study: The Fremantle Diabetes Study | To determine the incidence, predictors and costs of FCN provision to patients with type 2 diabetes in a large community-based representative study of diabetes in an urban Australian setting | Cross sectional study | Patients with type 2 diabetes enrolled in the Fremantle Diabetes Study (FDS) | Australia   | Clinical practice and Outcomes<br>Chronic diseases, including diabetes mellitus in particular, require a high level of clinical practice and FCN skills, for the treatment of complications of the disease in the elderly. Home care for diabetes has an average national cost of 5% to add to the total Australian direct healthcare costs of diabetes. |
| 20 | Dening H.K. (2016)  | Exploring the community nurse role in family-centred care for patients with dementia                                                  | To describe the epidemiology and characteristics of dementia and interventions that can be implemented by FCNs to support the patient and his family                                          | A case studies        | Nurses supporting patients with dementia                                     | UK          | Clinical practice<br>The article reports 3 case studies from which it emerges that the FCN plays a central role in the early recognition of the disease and in providing relationship-based care to both patients and family members                                                                                                                     |

|    |                     |                                                                                                                              |                                                                                                                         |                       |                                                          |        |                                                    |                                                                                                                                                                                                                                                                                                                                                                                                                 |
|----|---------------------|------------------------------------------------------------------------------------------------------------------------------|-------------------------------------------------------------------------------------------------------------------------|-----------------------|----------------------------------------------------------|--------|----------------------------------------------------|-----------------------------------------------------------------------------------------------------------------------------------------------------------------------------------------------------------------------------------------------------------------------------------------------------------------------------------------------------------------------------------------------------------------|
|    |                     | Developing and Implementing the Family Nurse Practitioner Role in Eswatini: Implications for Education, Practice, and Policy | To illustrate the stages of the process of developing and implementing the role of FCN in Eswatini                      | Discussion paper      | Nurses going to be FCN                                   | Africa | Advanced training program                          | The Nursing Board and Faculty of Nursing have committed to securing courses for the graduate level and have provided FCNs with the knowledge, skills and teaching and clinical skills necessary for successful FCN practice. The program proposal submitted to the university included the curriculum.                                                                                                          |
| 21 | Dlamini C.P. (2020) |                                                                                                                              |                                                                                                                         |                       |                                                          |        |                                                    |                                                                                                                                                                                                                                                                                                                                                                                                                 |
| 22 | Duncan D. (2021)    | Role of the FCN in Parkinson's disease and lower urinary disorders                                                           | To report the role of FCN in caring patients with Parkinson and lower urinary disorders                                 | Discussion paper      | Patients with Parkinson disease and urinary difficulties | UK     | Clinical practice                                  | Among the different symptoms of Parkinson's is urinary incontinence. The FCN has a key role to play in assessing these outcomes and supporting families through teaching pelvic floor exercises and accessing the supply of incontinence products                                                                                                                                                               |
| 23 | Falavigna G. (2020) | The socio-economic planning of a FCNs programme in mountain areas: A Directional Distance Function approach                  | To verify the sustainability of a European Union project, funded by the Alpine Space Programme.                         | Cross sectional study | Municipalities with at least one bad outcome in Piedmont | Italy  | Outcomes and Organizational and educational models | Consensus model care places older people at the center of health and social care by allowing them to stay at home as long as possible. It is based on the crucial role of the FCN. In order to determine in which places it is more appropriate to implement the model, altitude has proved to be a statistically significant item in the possibility of access to care and services by the elderly population. |
| 24 | Flavell T. (2015)   | An overview of eczema management for FCNs                                                                                    | To offer an overview of the main eczematous conditions and related interventions that FCNs can implement to manage them | Cross sectional study | Nurses interested in managing eczema                     | UK     | Clinical practice                                  | FCN plays a key role in health promotion and treatment of chronic conditions, including eczema. FCNs must be able to recognize the different types of eczema and implement specific treatments, involving caregivers and the family.                                                                                                                                                                            |
| 25 | Fu W. (2010)        | Development of FCN in Zhejiang Province, China: a report of the driving measures                                             | To describe the development of FCN in Zhejiang                                                                          | Discussion paper      | Zhejiang Community nursing                               | China  | Advanced training program and Core competencies    | In China, a 1-year postgraduate course is organized in a specific way: it is composed of 6 months theory, 6 months practical, allowing registered nurses to specialize in FCN. The primary care center carries out all health activities, including disease prevention, treatment, rehabilitation, health                                                                                                       |

|    |                          |                                                                                                                                                     |                                                                                                                                                                                                                                                                                             |                      |                |           |                                                 |                                                                                                                                                                                                                                                                                                                                                                                                                                                                 |                                                                                                                                                                                                                                                                                                                                                                                                                                                            |
|----|--------------------------|-----------------------------------------------------------------------------------------------------------------------------------------------------|---------------------------------------------------------------------------------------------------------------------------------------------------------------------------------------------------------------------------------------------------------------------------------------------|----------------------|----------------|-----------|-------------------------------------------------|-----------------------------------------------------------------------------------------------------------------------------------------------------------------------------------------------------------------------------------------------------------------------------------------------------------------------------------------------------------------------------------------------------------------------------------------------------------------|------------------------------------------------------------------------------------------------------------------------------------------------------------------------------------------------------------------------------------------------------------------------------------------------------------------------------------------------------------------------------------------------------------------------------------------------------------|
|    |                          |                                                                                                                                                     |                                                                                                                                                                                                                                                                                             |                      |                |           |                                                 |                                                                                                                                                                                                                                                                                                                                                                                                                                                                 | education and technical assistance to family planning. FNCs provide care based on evidence and best practice, have the knowledge, skills and competencies to tailor the care they provide to individual needs. The main activities of FNCs are assistance, education and health promotion and the management and evaluation of its work. They have to work coordinating with other professionals by promoting relations between social and health services |
| 26 | Gafas González C. (2017) | Community and Family Nursing specialisation program: a reality in Ecuador                                                                           | To train FCN to take care including the patients and his family respecting their cultures and human rights.                                                                                                                                                                                 | A mixed method study | FCNs           | Ecuador   | Clinical practice and Core competencies         | The literature shows that PHC is the primary area where FCN feels best represented in its key role. FCN are committed, among other things, to the prevention of malnutrition. From the interviews it emerges that lack of time is the main problem that hinders a correct nutritional screening, however the use of the proposed tool "MUST" has received positive reviews, with the proposal to include it in the compulsory training that continues that one. |                                                                                                                                                                                                                                                                                                                                                                                                                                                            |
| 27 | Green S.M. (2014)        | Barriers and facilitations to screening for malnutrition by FCNs: a qualitative study                                                               | To understand FCNs' perceptions of barriers and facilitators to undertaking nutritional screening: identify factors that enable and prevent FCNs, who provide care for adults in their own home, to undertake nutritional screening using a screening tool on patients admitted their care. | Qualitative study    | FCNs           | Australia | Clinical practice                               | FCN provide tertiary health care, supporting patients, families, and communities in illness management, such as chronic pain. However, the pharmacological approach is predominantly used. The study evaluates the increase in the use of holistic treatments by FCNs after an online preparation course, noting an increase in the possibility of prescribing each new approach, with the exception of massage therapy.                                        |                                                                                                                                                                                                                                                                                                                                                                                                                                                            |
| 28 | Gregg S.R. (2019)        | Try-It-On: preparing family nurse practitioners to use holistic integrative interventions to reduce opioid prescriptions in chronic pain management | To prepare future FNP's to use holistic integrative interventions and effective communication skills to decrease overprescribing of opioids for chronic pain management.                                                                                                                    | Longitudinal study   | FCNs           | USA       | Clinical practice and Advanced training program | Health promotion is one of the key activities of the FCN and includes, among others, the prevention of malnutrition. FCN should discuss appetite,                                                                                                                                                                                                                                                                                                               |                                                                                                                                                                                                                                                                                                                                                                                                                                                            |
| 29 | Holdaway A. (2019)       | What more can FCNs do to manage adult malnutrition                                                                                                  | To provide an overview of groups at risk of malnutrition in the community and the effects and clinical                                                                                                                                                                                      | Discussion paper     | Adult patients | UK        | Clinical practice                               |                                                                                                                                                                                                                                                                                                                                                                                                                                                                 |                                                                                                                                                                                                                                                                                                                                                                                                                                                            |

|    |                                          |                                                                                                                                    |                                                                                                                                                                                                                                                                                                                                                                                                                         |                     |                                                                 |               |                                         |                                                                                                                                                                                                                                                                                                                                                    |
|----|------------------------------------------|------------------------------------------------------------------------------------------------------------------------------------|-------------------------------------------------------------------------------------------------------------------------------------------------------------------------------------------------------------------------------------------------------------------------------------------------------------------------------------------------------------------------------------------------------------------------|---------------------|-----------------------------------------------------------------|---------------|-----------------------------------------|----------------------------------------------------------------------------------------------------------------------------------------------------------------------------------------------------------------------------------------------------------------------------------------------------------------------------------------------------|
|    |                                          |                                                                                                                                    | consequences of non-identification by defining how FCNs can play a critical role in early identification and care                                                                                                                                                                                                                                                                                                       |                     |                                                                 |               |                                         | nutrition and hydration daily with his patients. The article sets out some strategies for managing the problem such as fortifying food, encouraging you to try different eating patterns and to change the consistency of foods in case of difficulty in swallowing, personalization of the choice of food and possibly the use of supplements.    |
| 30 | Howerton C.R. (2011)                     | Breast augmentation. Motives and the role of the family nurse practitioner                                                         | 1. To present epidemiological data on additive mastoplasty interventions and its psychological implications. 2. To suggest ways in which district nurses can ensure adequate support for women who resort or want to resort to this type of surgery. Describe the epidemiology and characteristics of palliative care in the UK and interventions that can be implemented by FCNs to support the patient and his family | Discussion on paper | Women who undergo breast augmentation surgery                   | USA           | Clinical practice and Core competencies | FCNs are recognized as essential for advising women interested in breast augmentation. Therefore, communication skills are fundamental in this approach to understand what a woman's motivation is by helping her to make the best choice. Knowledge about the intervention and its course are therefore a basic requirement for adequate support. |
| 31 | Husband J. (2008)                        | The evolving role of the FCN specialist in palliative care                                                                         |                                                                                                                                                                                                                                                                                                                                                                                                                         | Discussion on paper | FCN specialists in palliative care                              | UK            | Clinical practice                       | The guarantee of patients' respect and dignity and communication skills emerged as a peculiarity of FCN, which play a key role in palliative care, in particular to support patients and their families in the process of accompanying death.                                                                                                      |
| 32 | Huy N.V. (2018)                          | The roles of, activities of, and competencies for, community nursing services in rural Vietnam: Implications for policy decisions. | To explore the roles, activities, and competencies required of FCNs in rural districts of Vietnam.                                                                                                                                                                                                                                                                                                                      | Qualitative study   | 12 men and 4 women with work experience in local health systems | Vietnam       | Core competencies                       | Educating and promoting health, managing, monitoring and evaluating health activities as part of the team are the fundamental aspects of FCNs.                                                                                                                                                                                                     |
| 33 | International Family Nursing Association | Position statement on planetary health and family health                                                                           | Inform IFNA members, educators, researchers, healthcare professionals of the link between planetary health and family health; Offer                                                                                                                                                                                                                                                                                     | Discussion on paper | Patients and their families                                     | International | Clinical practice and Core competencies | Planetary health is important, and FCN should take into account of it in sustainable practices. FCN take into account not only patient but also the relationship with his family member. In addition,                                                                                                                                              |

|    |                       |                                                                                                                                                                                                                                     |                                                                                                                                                          |                                       |       |                                                                                                                                                                                                                                                                                                                                                                                                                                                                                                                                 |
|----|-----------------------|-------------------------------------------------------------------------------------------------------------------------------------------------------------------------------------------------------------------------------------|----------------------------------------------------------------------------------------------------------------------------------------------------------|---------------------------------------|-------|---------------------------------------------------------------------------------------------------------------------------------------------------------------------------------------------------------------------------------------------------------------------------------------------------------------------------------------------------------------------------------------------------------------------------------------------------------------------------------------------------------------------------------|
|    | (INFA)<br>(2020)      | direction and support for family nursing education, research, and practice on the topic of the planetary health as it relates to family health.                                                                                     |                                                                                                                                                          |                                       |       | FCN demonstrates skills to collaborate and work in multidisciplinary teams, leadership skills and systems thinking to ensure the quality of nursing.                                                                                                                                                                                                                                                                                                                                                                            |
| 34 | Ippoliti R.<br>(2018) | The sustainability of a FCNs programme aimed at supporting active ageing in mountain areas                                                                                                                                          | Describe and evaluate the sustainability of the CONSENSO project                                                                                         | Discussion paper on FCNs              | Italy | <p>The FCN is a key figure in assisting elderly patients, especially in areas furthest from health services. The CONSENSO project implements the figure of the FCN precisely in these areas. However, in order for the project to be sustainable even without European funds, a cost-benefit study is needed. The study demonstrates how, to implement the FCN without added costs for the SSN, it is necessary that the work of the latter is able to prevent falls with hip fracture, saving money to health care system.</p> |
| 35 | Jin L.<br>(2020)      | Family nursing with the assistance of network improves clinical outcome and life quality in patients underwent coronary artery bypass grafting: a consolidated standards of reporting trials-compliant randomized controlled trial. | To investigate the effect of family nurse activity with network assistance on clinical outcomes in patients undergoing coronary arterial bypass grafting | A randomized controlled study         | China | <p>The psychological aspect is an important aspect in supporting the health of patients, especially to reduce anxiety and stress. FCN is able to significantly reduce both the incidence of complications and mental health disorders and lung function better than the control group. The effectiveness is greater especially in the medium to long term.</p>                                                                                                                                                                  |
| 36 | Johnson A.<br>(2015)  | Analysing the role played by district and FCNs in bereavement support                                                                                                                                                               | To explore mourning support as one of the roles of district (DN) and community (CN) nurses.                                                              | Discussion paper on District and FCNs | UK    | <p>FCNs are fully involved in the care of patients and their families, including the bereavement phase. To accompany the daughters in this delicate phase it is necessary that they are adequately trained and know how to recognize the different stages of mourning. Duration</p>                                                                                                                                                                                                                                             |

|    |                        |                                                                                                                                   |                                                                                                                                                                               |                   |                          |          |                                                                                                                                                                                                                                                                                                                                                                                                                                                                                                                                                                                                                                                                                                                                                                                                                                                                                                                                                                                                                                                                                                                                                                                                                                                                                                                                                                           |
|----|------------------------|-----------------------------------------------------------------------------------------------------------------------------------|-------------------------------------------------------------------------------------------------------------------------------------------------------------------------------|-------------------|--------------------------|----------|---------------------------------------------------------------------------------------------------------------------------------------------------------------------------------------------------------------------------------------------------------------------------------------------------------------------------------------------------------------------------------------------------------------------------------------------------------------------------------------------------------------------------------------------------------------------------------------------------------------------------------------------------------------------------------------------------------------------------------------------------------------------------------------------------------------------------------------------------------------------------------------------------------------------------------------------------------------------------------------------------------------------------------------------------------------------------------------------------------------------------------------------------------------------------------------------------------------------------------------------------------------------------------------------------------------------------------------------------------------------------|
|    |                        |                                                                                                                                   |                                                                                                                                                                               |                   |                          |          | of post-bereavement care should be tailored to the needs and response of individual families.                                                                                                                                                                                                                                                                                                                                                                                                                                                                                                                                                                                                                                                                                                                                                                                                                                                                                                                                                                                                                                                                                                                                                                                                                                                                             |
|    |                        |                                                                                                                                   |                                                                                                                                                                               |                   |                          |          | FCNs are fully involved in the care of patients and their families, including the bereavement phase. From the interviews emerge 5 main themes related to the management of bereavement, first of all the question of time, then the specificity of the case, the interprofessional work, one's role and experience. The results show that if on the one hand there is an awareness of bereavement care, on the other there is a lack of training. The model included 3 main thematic areas, namely: implementing a participatory action approach by mobilizing the social capital of families, using the family care process and implementing action strategies within communities. Participants agreed that this process encouraged their critical thinking and creativity by allowing them to solve problems in practice. Conditions such as faecal incontinence, although clinically less severe than other conditions, generate anxiety, embarrassment and insecurity in sufferers. Communication is essential for the creation of the nurse-patient relationship and the provision of quality services. In addition to communication, consultation and collaboration with patients and their families, nurses must develop skills in interpersonal relationships to be used also within multidisciplinary teams. For this, an educational program is very important. |
| 37 | Johnson A. (2015)      | Role of district and FCNs in bereavement care: a qualitative study.                                                               | Explore the role of bereavement care from the community or district nurses' perspectives                                                                                      | Qualitative study | District nurses and FCNs | UK       | Clinical practice and Outcomes                                                                                                                                                                                                                                                                                                                                                                                                                                                                                                                                                                                                                                                                                                                                                                                                                                                                                                                                                                                                                                                                                                                                                                                                                                                                                                                                            |
| 38 | Jongudomkarn D. (2014) | Development of a Family Nursing Model for Prevention of Cancer and Other Noncommunicable Diseases through an Appreciative Inquiry | To develop family nursing practice in primary care setting in the Isaan region or Northeastern Thailand and to distil what worked well into a nursing model to guide practice | Qualitative study | FCNs                     | Thailand | Clinical practice, Outcomes and Organizational and educational models                                                                                                                                                                                                                                                                                                                                                                                                                                                                                                                                                                                                                                                                                                                                                                                                                                                                                                                                                                                                                                                                                                                                                                                                                                                                                                     |
| 39 | Kelly A.M. (2019)      | What can FCNs do for older adults who experience faecal incontinence?                                                             | To describe the epidemiology and characteristics of fecal incontinence and interventions that can be implemented by FCN                                                       | Discussion paper  | FCNs                     | Ireland  | Clinical practice and Outcomes                                                                                                                                                                                                                                                                                                                                                                                                                                                                                                                                                                                                                                                                                                                                                                                                                                                                                                                                                                                                                                                                                                                                                                                                                                                                                                                                            |

|    |                  |                                                                                                                                                                                                         |                                                                                                                                                                                                                                      |                               |                                         |         |                                       |                                                                                                                                                                                                                                                                                                                                                                                                                        |
|----|------------------|---------------------------------------------------------------------------------------------------------------------------------------------------------------------------------------------------------|--------------------------------------------------------------------------------------------------------------------------------------------------------------------------------------------------------------------------------------|-------------------------------|-----------------------------------------|---------|---------------------------------------|------------------------------------------------------------------------------------------------------------------------------------------------------------------------------------------------------------------------------------------------------------------------------------------------------------------------------------------------------------------------------------------------------------------------|
| 40 | Kent S. (2011)   | Community nurses' child protection role: views of public health nurses in Ireland                                                                                                                       | To present the results of a qualitative analysis who explored the views of a group of public health nurses regarding their role with pre-schoolers                                                                                   | Qualitative study             | FCNs                                    | Ireland | Clinical practice                     | The activities of the FCN also include the protection and care of children. The role of the public health nurse in child protection concerns the prevention of child abuse, relationships with social workers and the ability to identify households at risk. The study reveals that many nurses detect situations of potential risk but are unable to manage them adequately. More training is needed in this regard. |
| 41 | Kwok T. (2008)   | A randomized controlled trial of a FCN-supported hospital discharge programme in older patients with chronic heart failure                                                                              | To evaluate the effectiveness and cost-effectiveness of a FCN-supported hospital discharge program in preventing readmissions, in the improvement of the functional status and handicap of older patients with chronic heart failure | A randomized controlled study | Elderly patients                        | China   | Clinical practice and Outcomes        | The study shows that there is no significant difference between the results of the control group and that followed by the FCNs in terms of readmission rates ( $p = 0.233$ ) and the 6-minute walking test; Significant results were instead recorded in favour of the intervention group with regard to autonomy and the average of re-hospitalizations ( $p = 0.057$ ).                                              |
| 42 | Lalani M. (2019) | Transforming FCN services in the UK; lessons from a participatory evaluation of the implementation of a new community nursing model in East London based on the principles of the Dutch Buurtzorg model | To explore the extent to which some of the principles of the Buurtzorg model could be adapted to FCN                                                                                                                                 | Qualitative study             | FCNs                                    | UK      | Organizational and educational models | Although the Burtorzg model was born in the Netherlands in a health, social, financial and cultural context very different from that of the United Kingdom, the study notes positive outcomes regarding the patient's care experience, understood as better access to and continuity of care. t                                                                                                                        |
| 43 | Lee G. (2017)    | The future of community nursing: Hospital in the Home                                                                                                                                                   | To describe the "Hospital in the home" service as a useful service for aged people                                                                                                                                                   | Discussion paper              | A 78 aged women with COPD riacutization | UK      | Organizational and educational models | The case study examines a community care model called "The hospital at home". The case study highlights the ability to assess, treat and manage a patient with an acute event in the community without the need for hospitalization. This type of integrated                                                                                                                                                           |

|    |                       |                                                                                     |                                                                                                                                                                                                                        |                       |                                             |       |                                                                     |                                                                                                                                                                                                                                                       |
|----|-----------------------|-------------------------------------------------------------------------------------|------------------------------------------------------------------------------------------------------------------------------------------------------------------------------------------------------------------------|-----------------------|---------------------------------------------|-------|---------------------------------------------------------------------|-------------------------------------------------------------------------------------------------------------------------------------------------------------------------------------------------------------------------------------------------------|
|    |                       |                                                                                     |                                                                                                                                                                                                                        |                       |                                             |       |                                                                     | multidisciplinary care model is a valid alternative to traditional care models in both acute and community settings. The case study demonstrates the model's ability to deliver a comprehensive package of multidisciplinary care in a person's home. |
|    |                       |                                                                                     |                                                                                                                                                                                                                        |                       |                                             |       |                                                                     | The study examines a training model, the "The Family Nursing Assessment and                                                                                                                                                                           |
|    |                       |                                                                                     |                                                                                                                                                                                                                        |                       |                                             |       |                                                                     | Intervention Map" (FN-AIM).                                                                                                                                                                                                                           |
|    |                       |                                                                                     |                                                                                                                                                                                                                        |                       |                                             |       |                                                                     | The FN-AIM is a pedagogical                                                                                                                                                                                                                           |
|    |                       |                                                                                     |                                                                                                                                                                                                                        |                       |                                             |       |                                                                     | tool based on the structure of                                                                                                                                                                                                                        |
|    |                       |                                                                                     |                                                                                                                                                                                                                        |                       |                                             |       |                                                                     | family systems and consists of                                                                                                                                                                                                                        |
|    |                       |                                                                                     |                                                                                                                                                                                                                        |                       |                                             |       |                                                                     | 7 fields. The course is                                                                                                                                                                                                                               |
|    |                       |                                                                                     |                                                                                                                                                                                                                        |                       |                                             |       |                                                                     | structured around learning                                                                                                                                                                                                                            |
|    |                       |                                                                                     |                                                                                                                                                                                                                        |                       |                                             |       |                                                                     | objectives that embrace the                                                                                                                                                                                                                           |
|    |                       |                                                                                     |                                                                                                                                                                                                                        |                       |                                             |       |                                                                     | cognitive and affective                                                                                                                                                                                                                               |
|    |                       |                                                                                     |                                                                                                                                                                                                                        |                       |                                             |       |                                                                     | domains of learning, with                                                                                                                                                                                                                             |
|    |                       |                                                                                     |                                                                                                                                                                                                                        |                       |                                             |       |                                                                     | assignments that mirror the                                                                                                                                                                                                                           |
|    |                       |                                                                                     |                                                                                                                                                                                                                        |                       |                                             |       |                                                                     | indicators of systemic thinking.                                                                                                                                                                                                                      |
|    |                       |                                                                                     |                                                                                                                                                                                                                        |                       |                                             |       |                                                                     | Students demonstrated a better                                                                                                                                                                                                                        |
|    |                       |                                                                                     |                                                                                                                                                                                                                        |                       |                                             |       |                                                                     | approach after using the FN-                                                                                                                                                                                                                          |
|    |                       |                                                                                     |                                                                                                                                                                                                                        |                       |                                             |       |                                                                     | AIM mapping system.                                                                                                                                                                                                                                   |
|    |                       |                                                                                     |                                                                                                                                                                                                                        |                       |                                             |       |                                                                     | FCN plays an important role in                                                                                                                                                                                                                        |
|    |                       |                                                                                     |                                                                                                                                                                                                                        |                       |                                             |       |                                                                     | the treatment of chronic                                                                                                                                                                                                                              |
|    |                       |                                                                                     |                                                                                                                                                                                                                        |                       |                                             |       |                                                                     | diseases, including the diabetic                                                                                                                                                                                                                      |
|    |                       |                                                                                     |                                                                                                                                                                                                                        |                       |                                             |       |                                                                     | foot. This role is supported by                                                                                                                                                                                                                       |
|    |                       |                                                                                     |                                                                                                                                                                                                                        |                       |                                             |       |                                                                     | local and national guidelines,                                                                                                                                                                                                                        |
|    |                       |                                                                                     |                                                                                                                                                                                                                        |                       |                                             |       |                                                                     | protocols and personal                                                                                                                                                                                                                                |
|    |                       |                                                                                     |                                                                                                                                                                                                                        |                       |                                             |       |                                                                     | training. In the management of                                                                                                                                                                                                                        |
|    |                       |                                                                                     |                                                                                                                                                                                                                        |                       |                                             |       |                                                                     | these patients, the educational                                                                                                                                                                                                                       |
|    |                       |                                                                                     |                                                                                                                                                                                                                        |                       |                                             |       |                                                                     | activity and the assumption of                                                                                                                                                                                                                        |
|    |                       |                                                                                     |                                                                                                                                                                                                                        |                       |                                             |       |                                                                     | both the patient and the family                                                                                                                                                                                                                       |
|    |                       |                                                                                     |                                                                                                                                                                                                                        |                       |                                             |       |                                                                     | are fundamental.                                                                                                                                                                                                                                      |
|    |                       |                                                                                     |                                                                                                                                                                                                                        |                       |                                             |       |                                                                     | The study notes that the daily                                                                                                                                                                                                                        |
|    |                       |                                                                                     |                                                                                                                                                                                                                        |                       |                                             |       |                                                                     | routine of FCNs most                                                                                                                                                                                                                                  |
|    |                       |                                                                                     |                                                                                                                                                                                                                        |                       |                                             |       |                                                                     | frequently involved                                                                                                                                                                                                                                   |
|    |                       |                                                                                     |                                                                                                                                                                                                                        |                       |                                             |       |                                                                     | vaccinations and primary care                                                                                                                                                                                                                         |
|    |                       |                                                                                     |                                                                                                                                                                                                                        |                       |                                             |       |                                                                     | services, while the main roles                                                                                                                                                                                                                        |
|    |                       |                                                                                     |                                                                                                                                                                                                                        |                       |                                             |       |                                                                     | were those of caregiver,                                                                                                                                                                                                                              |
|    |                       |                                                                                     |                                                                                                                                                                                                                        |                       |                                             |       |                                                                     | educator, organizer and                                                                                                                                                                                                                               |
|    |                       |                                                                                     |                                                                                                                                                                                                                        |                       |                                             |       |                                                                     | manager.                                                                                                                                                                                                                                              |
|    |                       |                                                                                     |                                                                                                                                                                                                                        |                       |                                             |       |                                                                     | The study shows a new theory                                                                                                                                                                                                                          |
|    |                       |                                                                                     |                                                                                                                                                                                                                        |                       |                                             |       |                                                                     | for a higher level of clinical                                                                                                                                                                                                                        |
|    |                       |                                                                                     |                                                                                                                                                                                                                        |                       |                                             |       |                                                                     | practice, following the                                                                                                                                                                                                                               |
|    |                       |                                                                                     |                                                                                                                                                                                                                        |                       |                                             |       |                                                                     | HADPIPE model which aimed                                                                                                                                                                                                                             |
|    |                       |                                                                                     |                                                                                                                                                                                                                        |                       |                                             |       |                                                                     | to investigate: History of the                                                                                                                                                                                                                        |
|    |                       |                                                                                     |                                                                                                                                                                                                                        |                       |                                             |       |                                                                     | problem, Evaluation of patient                                                                                                                                                                                                                        |
|    |                       |                                                                                     |                                                                                                                                                                                                                        |                       |                                             |       |                                                                     | problems, Diagnosis of disease,                                                                                                                                                                                                                       |
| 44 | Looman W.S. (2020)    | Teaching Systems Thinking for Advanced Family Nursing Practice: A Theory-Based Tool | Evaluate the effect of use of The Family Nursing Assessment and Intervention Map (FN-AIM) as an educational tool to support student skill development as part of a graduate family nursing course in the United States | Discussion paper      | Nursing students                            | USA   | Organizational and educational models and Advanced training program |                                                                                                                                                                                                                                                       |
| 45 | Lumbergs M. (2021)    | Osteomyelitis, diabetic foot ulcers and the role of the FCN                         | Describe the epidemiology, characteristics and management of diabetic foot and infection-related and the role of nurses in his management                                                                              | Discussion paper      | FCNs                                        | UK    | Clinical practice                                                   |                                                                                                                                                                                                                                                       |
| 46 | Ma W. (2018)          | Roles and activities of FCNs in China: a descriptive study                          | To collect information about the current status of FCNs in China; and explore the roles and activities that they perform in their daily community setting                                                              | Cross sectional study | FCNs                                        | China | Clinical practice                                                   |                                                                                                                                                                                                                                                       |
| 47 | MacDonald J.M. (2005) | Combination model of care for FCN practitioners                                     | Analyse and discuss the combined model and establish whether or not the FCNs were able to achieve a higher level of practice.                                                                                          | Qualitative study     | Nurse practitioner consultations and nurses | UK    | Organizational and educational models                               |                                                                                                                                                                                                                                                       |

|    |                            |                                                                                                                                               |                                                                                                                                                                                                                                   |                       |                                                              |           |                                         |                                                                                                                                                                                                                                                                                                             |                                                                            |
|----|----------------------------|-----------------------------------------------------------------------------------------------------------------------------------------------|-----------------------------------------------------------------------------------------------------------------------------------------------------------------------------------------------------------------------------------|-----------------------|--------------------------------------------------------------|-----------|-----------------------------------------|-------------------------------------------------------------------------------------------------------------------------------------------------------------------------------------------------------------------------------------------------------------------------------------------------------------|----------------------------------------------------------------------------|
|    |                            |                                                                                                                                               |                                                                                                                                                                                                                                   |                       |                                                              |           |                                         | based in ambulatory hospital settings                                                                                                                                                                                                                                                                       | Implementation of care, Discharge of the patient, Evaluation of treatment. |
| 48 | Marcadelli S. (2019)       | Policy proposals for a new welfare: the development of the family and FCN in Italy as the key to promote social capital and social innovation | To discuss the development of the family and community health care in Italy by focusing on three levels organizational, political and theoretical                                                                                 | Mixed method study    | Nurses and Stakeholders                                      | Italy     | Clinical practice and core competencies | FCN has an important social value as part of the multidisciplinary team and ensuring a continuity of care because of his involvement in the creation of social support for community's needs and for the prevention and treatment of the chronic diseases as a quality for the improvement in nursing care. |                                                                            |
| 49 | Martínez-Riera J.R. (2019) | Family and community nursing, chronology of a specialty                                                                                       | Describe the development of community nursing from 1987 to 2018                                                                                                                                                                   | Cross sectional study | FCNs                                                         | Spain     | Clinical practice                       | FCN is prioritized, as part of a development of the nursing role, because able to act for the primary and community care.                                                                                                                                                                                   |                                                                            |
| 50 | McCrae N. (2014)           | The role of FCNs in preventing female genital mutilation (FGM)                                                                                | Explain the context and culture within which the FGM originates and the ways in which FCNs can recognize and deal with situations at risk                                                                                         | Discussion paper      | Women and girls who are victims of female genital mutilation | UK        | Clinical practice                       | FCN has a duty in recognizing women and girls at risk of FGM and supporting them before and after the FGM                                                                                                                                                                                                   |                                                                            |
| 51 | McKenzie J.E. (2007)       | A sense of security for cancer patients at home: the role of FCNs                                                                             | Expose the presently unrecognized minutiae of FCNs' work with cancer patients at home, and to identify the ways in which these, combined to form comprehensive care episodes, contribute to physical and psychosocial well-being. | Qualitative study     | Patients and FCNs                                            | Australia | Outcomes                                | Visit at home from registered nurses are fundamental to strengthen the involvement of patients and their families in the educational programmes. This allow patients the possibility to be followed at home even if being re-admitted to hospital.                                                          |                                                                            |
| 52 | Mendes A. (2017)           | A FCN's role in supporting a 'good' experience of grief                                                                                       | Describe the main aspects of grief and the skills nurses need to support the family and the patient                                                                                                                               | Discussion paper      | Dying patient                                                | UK        | Clinical practice                       | FCNs can and do make a difference to better support patients dying and even before that difficult moment for him and his family.                                                                                                                                                                            |                                                                            |
| 53 | Mendes A. (2018)           | Personal beliefs, culture and religion in                                                                                                     | To help FCNs to raise awareness of their own values and those                                                                                                                                                                     | Discussion paper      | Ethical dilemmas                                             | UK        | Core competencies                       | It's important for FCNs taking care of patients without judgment, working hard to                                                                                                                                                                                                                           |                                                                            |

|    |                              |                                                                                          |                                                                                                                                                                                                                                    |                          |                                |              |                                       |                                                                                                                                                                                                                            |
|----|------------------------------|------------------------------------------------------------------------------------------|------------------------------------------------------------------------------------------------------------------------------------------------------------------------------------------------------------------------------------|--------------------------|--------------------------------|--------------|---------------------------------------|----------------------------------------------------------------------------------------------------------------------------------------------------------------------------------------------------------------------------|
|    |                              | community nursing care                                                                   | of the people they care for to better address the ethical dilemmas that may be encountered                                                                                                                                         |                          | within health care             |              |                                       | deliver impartial and individualized care with the utmost compassion and sensitivity.                                                                                                                                      |
| 54 | Mnisi S.D. (2012)            | Role of FCNs in the prevention of tuberculosis in the Tshwane Health District of Gauteng | To describe the role of FCNs in the prevention of tuberculosis (TB) in order to improve the part they play in the comprehensive management of TB patients; and to identify problems experienced by them when fulfilling this role. | Cross sectional study    | Registered Nurses              | South Africa | Clinical practice                     | FCNs has a key function in educating patients in high-risk areas for that infections, such as TB, which is still spreading within the community.                                                                           |
| 55 | Morin D. (2009)              | From hospital to home after cardiac surgery                                              | To evaluate the implementation process of FCN care management model; to assess the effect of this model on patients followed at home.                                                                                              | Quasi-experimental study | Hospitalized patients          | Canada       | Organizational and educational models | The influence of the FCN for the Care Management Model encouraged reorganization and harmonization of nursing practices for patients' cardiac surgery post-intervention following them even after discharge from hospital. |
| 56 | Nazarko L. (2013)            | Cognitive assessment: a guide for FCNs                                                   | Provide a brief explanation of common screening tools and explains the FCN's role in identifying people who may have undiagnosed dementia                                                                                          | Discussion paper         | Patients with dementia         | UK           | Clinical practice                     | FCN can improve diagnosis rates and ensure the adequate patient's assess to treatment.                                                                                                                                     |
| 57 | Nazarko L. (2016)            | Considering the difficulties with dysphagia: an overview for FCNs                        | Describe dysphagia, its impact on sufferers and the role of the FCN in this regard.                                                                                                                                                | Discussion paper         | Patients with dysphagia        | UK           | Clinical practice                     | FCN has to support patients and their families for the management of dysphagia which could determine clinical problems in elderly.                                                                                         |
| 58 | Nissanholtz-Gannot R. (2020) | FCNs and chronic disease in Israel: Professional dominance as a social justice issue.    | To analyse comparative changes in FCNs' roles in Israel in recent years, especially related to chronic disease, which can underlie health inequalities                                                                             | Qualitative study        | 55 health system professionals | Israel       | Clinical practice                     | FCNs role has expanded a lot, ensuring an improvement of chronic diseases' management and a high-level care.                                                                                                               |
| 59 | Nissanholtz-Gannot           | The changing roles of FCNs: the case of health                                           | To identify recent changes in the roles of health plan nurses and their current areas of                                                                                                                                           | Qualitative study        | 55 senior nursing and          | Israel       | Outcomes                              | FCNs had referred high level of work satisfaction, which is possible for a holistic patient care a delivery care continuity.                                                                                               |

|    |                         |                                                                                        |                                                                                                                                                                                                  |                          |                                                                                          |           |                   |  |                                                                                                                                                                                               |
|----|-------------------------|----------------------------------------------------------------------------------------|--------------------------------------------------------------------------------------------------------------------------------------------------------------------------------------------------|--------------------------|------------------------------------------------------------------------------------------|-----------|-------------------|--|-----------------------------------------------------------------------------------------------------------------------------------------------------------------------------------------------|
|    | R. (2017)               | plan nurses in Israel                                                                  | activity. It also explored the experience of front-line nurses with regard to autonomy, work satisfaction, and barriers to further role development.                                             |                          | medical professional; FCNs                                                               |           |                   |  | They felt an improvement in professional autonomy.                                                                                                                                            |
| 60 | Norman K.M. (2015)      | The image of community nursing: implications for future student nurse recruitment      | The article reports the results of a research that investigated the opinions of 40 young people regarding nursing as a profession                                                                | Qualitative study        | Nursing students from four schools in the West Midlands                                  | UK        | Core competencies |  | The holistic vision of patients and their caregiver allow the knowledge, skills and leadership capabilities to ensure an adequate planning and decision-making strategies                     |
| 61 | Ogston-Tuck S.A. (2018) | A silent epidemic: community nursing and effective pain management                     | To dispel the myths and improve clinical practice, particularly in effective pain assessment.                                                                                                    | Discussion paper         | Patients with chronic pain                                                               | UK        | Clinical practice |  | The FCN's pain assessment is fundamental, in particular for the recognition of factors that can influence one's experience of pain and it is fundamental for the approach to pain management. |
| 62 | Oliver S. (2009)        | Understanding the needs of older people with rheumatoid arthritis: the role of the FCN | This article outlines the particular challenges associated with rheumatoid arthritis in older people and how FCNs can contribute to assessing patients and helping to meet their needs for care. | Discussion paper         | Older patients                                                                           | UK        | Clinical practice |  | FCNs have a vital role in supporting older people with rheumatoid arthritis in symptom and disease control                                                                                    |
| 63 | Omeri A. (2004)         | Cultural diversity: A challenge for FCNs                                               | To support FCN to provide nursing care congruent with the different lifestyles and customs found in the community                                                                                | Discussion paper         | Different cultural groups with distinctive features of culture, ethnicity and disability | Australia | Core competencies |  | FCNs still struggle to approach different types of patients with different clinical situations. Nurses acting within the community is fundamental to achieve safe care.                       |
| 64 | Østergaard B. (2021)    | Effect of family nursing therapeutic conversations on                                  | Evaluate the short-term, medium-term and long-term effect of family nursing                                                                                                                      | Randomised control study | Patients with heart                                                                      | Denmark   | Outcomes          |  | Patients and their families feel more supported both at short-term (p = 0.002) medium-term (p = 0.008) and long-term (p =                                                                     |

|    |                                                                                                            |                                                                                                                                                                 |                                                                                                                                                          |                   |                                          |        |                                                                                                                                                                                                                                                                            |                                                                                                                                                                                        |
|----|------------------------------------------------------------------------------------------------------------|-----------------------------------------------------------------------------------------------------------------------------------------------------------------|----------------------------------------------------------------------------------------------------------------------------------------------------------|-------------------|------------------------------------------|--------|----------------------------------------------------------------------------------------------------------------------------------------------------------------------------------------------------------------------------------------------------------------------------|----------------------------------------------------------------------------------------------------------------------------------------------------------------------------------------|
|    | patients with heart failure and their family members: secondary outcomes of a randomised multicentre trial | therapeutic conversations added to conventional care on social support, family health and family functioning in outpatients with heart failure and their family |                                                                                                                                                          | failure clinics   |                                          |        | 0.018) among patients and their family members (p = <0.001; 0.007 and 0.014 respectively) in the intervention group in comparison with the control group. They reported an increased reinforcement, feedback, decision-making capability and collaboration with the nurse. |                                                                                                                                                                                        |
| 65 | Papadopoulou (2021)                                                                                        | Perceptions, practices and educational needs of FCNs to manage frailty                                                                                          | To understand nurses' perceptions of frailty in a community setting and their needs for education on its assessment and management                       | Qualitative study | FCNs                                     | UK     | Advanced training program                                                                                                                                                                                                                                                  | FCNs identified specific education about frailty patients and suggested to introduce this topic in undergraduate and postgraduate nursing programmes.                                  |
| 66 | Papathanasiou I. (2020)                                                                                    | Family Community Nursing Curriculum                                                                                                                             | To submit a Curriculum for the Training of FCNs                                                                                                          | Project           | FCNs facing 1 year of learning programme | Greece | Advanced training program                                                                                                                                                                                                                                                  | Training programme, based on the ENhANCE FCN reference curriculum, consists of 10 modules for a total of 250 hours of teaching and 1000 of practical internship.                       |
| 67 | Phelan A. (2010)                                                                                           | Elder abuse and the FCN: supporting the patient                                                                                                                 | To explain what elder abuse is, consider the FCN's role in elder abuse and describe details practice guidelines and challenges related to the issue      | Discussion paper  | Elderly patients                         | UK     | Clinical practice                                                                                                                                                                                                                                                          | The prevention of elderly abuse, which is one of the many areas of FCNs' caring is fundamental for that nurses who acts within patient's caregivers and homes.                         |
| 68 | Phillips A. (2016)                                                                                         | Supporting smoking cessation in older patients: a continuing challenge for FCNs                                                                                 | To discuss how FCNs can support their older patients to quit smoking by fostering a patient-centered partnership through good communication and empathy. | Discussion paper  | Older smoking patients                   | UK     | Clinical practice and core competencies                                                                                                                                                                                                                                    | Communication strategies are fundamental a patient centered-care as part of that competences which guide patients' in smoking cessation, as part of the specific caring areas of FCNs. |
| 69 | Pickstock S.(2017)                                                                                         | Breathlessness at end of life: what FCNs should know                                                                                                            | To support FCNs to gain knowledge patients and their families to manage breathlessness at end of life                                                    | Discussion paper  | Dying patients                           | UK     | Clinical practice                                                                                                                                                                                                                                                          | FCN has the fundamental role in knowing the history of breathlessness to identify and managing reversible pathologies.                                                                 |
| 70 | Pisano González M.M. (2019)                                                                                | Community and family nurse: Present keys, future challenges                                                                                                     | Describe the stages of development of training for FCNs in Spain, the results obtained and future scenarios                                              | Discussion paper  | Community nursing training               | Spain  | Core competencies and Advanced training                                                                                                                                                                                                                                    | Graduate training and learning was fundamental for FCNs to acquire more competencies for families and the entire community.                                                            |

|    |                         |                                                                                                                                       |                                                                                                                                                                                                                           |                                 |                                                                    |               |                                         |                                                                                                                                                                       |
|----|-------------------------|---------------------------------------------------------------------------------------------------------------------------------------|---------------------------------------------------------------------------------------------------------------------------------------------------------------------------------------------------------------------------|---------------------------------|--------------------------------------------------------------------|---------------|-----------------------------------------|-----------------------------------------------------------------------------------------------------------------------------------------------------------------------|
|    |                         |                                                                                                                                       |                                                                                                                                                                                                                           |                                 |                                                                    |               | progr<br>m                              |                                                                                                                                                                       |
| 71 | Randall D. (2021)       | Community nursing: will new standards be a panacea?                                                                                   | To show how, in past, the FCN, has attempted to create an economy of scale by merging community nursing with public health work without meeting the needs of nurses                                                       | Discussi<br>on<br>paper         | Nursing and Midwife ry Council's standards for specialist practice | UK            | Advanc<br>ed<br>training<br>progra<br>m | An urgent need for SPQ (Specialist Programme Qualification) courses has been recognized by nurses.                                                                    |
| 72 | Reid J. (2014)          | Managing urinary incontinence: guidelines for FCNs                                                                                    | To outline basic bladder function, detail the causes and types of urinary incontinence, and explore the role of the FCN in assessment and management.                                                                     | Discussi<br>on<br>paper         | Patients with urinary incontinence                                 | UK            | Clinical practice                       | FNC's activity is the one that could allow the recognition of symptoms, analysis of the person's lifestyle, knowledge of medications, patient support and management. |
| 73 | Roden J. (2016)         | Australian rural, remote and urban FCNs' health promotion role and function.                                                          | To investigate to sustainability of the health promotion activity carried out by Australian FCNs                                                                                                                          | A mixed-methods study           | Rural FCNs and of Urban FCNs                                       | Austral<br>ia | Clinical practice and Outcom<br>es      | Urban FCNs had a narrower view on caring for individuals rather than group Rural nurses had more positive attitudes towards health promotion.                         |
| 74 | Sasso L. (2018)         | Report on current FCN working and occupational contexts                                                                               | To provide a overview of current work and employment contexts of FCN                                                                                                                                                      | Discussi<br>on<br>paper         | 21 countries                                                       | Europe        | Core competencies                       | FCN must be able to adapt care to the needs of the individual. To do this, it must have skills and knowledge and be based on scientific evidence and best practices.  |
| 75 | Savini S. (2021)        | A family nurse-led intervention for reducing health services' utilization in individuals with chronic disease: the ADVICE pilot study | To assess whether a structured family nurse-led educational intervention was effective in reducing disease-related hospital readmissions. 2. To investigate the factors associated with the risk of health services' use. | Quasi-experim<br>ental<br>study | Patients                                                           | Italy         | Clinical practice and Outcom<br>es      | Educational intervention consisted of face-to-face sessions, fundamental for changeset in behavior and this let FCNs feel satisfied about their job.                  |
| 76 | Simonet<br>ti V. (2021) | Effectiveness of family nurse-led programme on accuracy of blood pressure self-management: a randomised controlled trial              | to evaluate the effectiveness of a Family Nurse Practitioner (FNP)-led programme on the degree of adherence of current recommendations on home blood pressure                                                             | A randomized control study      | Patients                                                           | Italy         | Clinical practice and Outcom<br>es      | Almost 75% of the patients in the intervention group,, after FNP intervention, demonstrated a better adherence of blood pressure measurement.                         |

|    |                      |                                                                                                                    |                                                                                                                                                                                             |                       |                                                                 |             |                                         |                                                                                                                                                                                          |
|----|----------------------|--------------------------------------------------------------------------------------------------------------------|---------------------------------------------------------------------------------------------------------------------------------------------------------------------------------------------|-----------------------|-----------------------------------------------------------------|-------------|-----------------------------------------|------------------------------------------------------------------------------------------------------------------------------------------------------------------------------------------|
|    |                      | self-management (HBPM) as compared to routine care and management.                                                 |                                                                                                                                                                                             |                       |                                                                 |             |                                         |                                                                                                                                                                                          |
| 77 | Skingle y A. (2016)  | Older people, isolation and loneliness: implications for community nursing                                         | Defining social isolation and loneliness and describe the implication for community nursing                                                                                                 | Discussion paper      | Older patients                                                  | UK          | Clinical practice                       | FCNs have to consider the entire social condition of patients, minimizing loneliness and social isolation.                                                                               |
| 78 | Slevin E. (2003)     | Learning disabilities: a survey of FCNs for people with prevalence of challenging behavior and contact demands     | To identify the overall caseload sized of the nurses, the prevalence of people with learning disabilities. 2. To discover courses or training that helped the nurses to fulfil their roles. | Cross sectional study | 65 patients with learning disabilities                          | UK          | Clinical practice                       | The CNLD has been defined as a special FCN as a member of the primary health care team who provides specialist advice to clients, their families and carers and to other professionals'. |
| 79 | Stuart E. (2020)     | Nutrition and wound care: what FCNs should know                                                                    | Wound healing: often coming at a great cost to patient quality of life, as well as the undeniable significant financial cost to the NHS.                                                    | Discussion paper      | Patients with leg ulcers                                        | UK          | Clinical practice                       | FCNs are part of the multidisciplinary team for improve healing as the fundamental part of the nutritional assessment.                                                                   |
| 80 | Terracino E.(2020)   | The effect of FCN on mortality and hospitalization in a group of over-75 older adults: a nested case-control study | To explore the causal association through the analysis of the hospitalization and mortality rate after a pro-active social service integrated by the FCN                                    | Cross sectional study | Groups of patients having access to different kind of services. | Italy       | Outcomes                                | A lower re-admission in patients was showed after a pro-active social service integrated by the FCN, if compared to the control group.                                                   |
| 81 | Vogel R.G. (2021)    | Process evaluation of a program to empower FCN leadership                                                          | To describe the process evaluation of NitL (Nurses in the Lead)                                                                                                                             | Mixed method study    | 97 FCNs and 31 team members,                                    | Netherlands | Outcomes                                | NitL programme led patients' and their families feel involved in the educational programme, led the FCN feel useful in their educational role.                                           |
| 82 | Wacharasin C. (2008) | Family nursing practice, education, and research. What is happening in Thailand?                                   | To describe the evolution of FCN in Thailand over the past 20 years                                                                                                                         | Discussion paper      | FCNs                                                            | Thailand    | Core competencies                       | The collaboration with the multidisciplinary team is fundamental in education role as well as in the research role of FCNs to provide a safe care.                                       |
| 83 | Wang S. (2019)       | Improving the curriculum for a community nursing training program in Guangzhou City, China                         | Improving the curriculum of community nursing training in Guangzhou                                                                                                                         | Cross sectional study | 318 participating nurses and instructors and                    | China       | Clinical practice and Advanced training | Nurses identified as priorities DT2M management, breast-self-check for public health. Furthermore, the final curriculum had 10 modules including 27 courses and 117                      |

|    |                      |                                                                                                                                              |                                                                                                                                                                                                                                      |                          |                                                                                                                |           |                                            |                                                                                                                                                               |
|----|----------------------|----------------------------------------------------------------------------------------------------------------------------------------------|--------------------------------------------------------------------------------------------------------------------------------------------------------------------------------------------------------------------------------------|--------------------------|----------------------------------------------------------------------------------------------------------------|-----------|--------------------------------------------|---------------------------------------------------------------------------------------------------------------------------------------------------------------|
|    |                      |                                                                                                                                              |                                                                                                                                                                                                                                      | 22 experts               |                                                                                                                | program   | items, based on the FCNs Training Outline. |                                                                                                                                                               |
| 84 | Weber S. (2010)      | A stigma identification: framework for family nurses working with parents who are lesbian, gay, bisexual or transgendered and their families | Identify what is stigma and how can family nurses be helped to better understand the nature of stigma.                                                                                                                               | Discussion paper         | FCNs                                                                                                           | USA       | Clinical practice                          | FCNs can have a positive impact for stigma and social marginalization on the mental health on LGBT patients and can counteract this stigma in positive ways.  |
| 85 | Widyarani D. (2020)  | Identifying Community/Public Health Nursing Competencies in Indonesia: A Modified Delphi Method                                              | To identify the competencies of the Indonesian nurses from experts using the C/PHN competencies of the Quad Council Coalition.                                                                                                       | Cross sectional study    | 8 experts from three universities with expertise of public health nursing and hold a master degree in nursing. | Indonesia | Core competencies                          | Communication skills are defined as one of the competencies of FCNs.                                                                                          |
| 86 | Wilkes L. (2014)     | Clients with chronic conditions: FCN role in a multidisciplinary team                                                                        | To define and validate the role of the FCN in a multidisciplinary team that takes care of peers with chronic and complex needs                                                                                                       | Cross sectional study    | FCNs                                                                                                           | UK        | Core competencies                          | The role of the FCN is fundamental in a multidisciplinary team and has six main domains: defender, advocate, coordinator, educator, team member and evaluate. |
| 87 | Wood-Baker R. (2012) | Clinical trial of FCN mentoring to improve self-management in patients with chronic obstructive pulmonary disease                            | To investigate the effect of a program increase self-management behaviours delivered by FCNs, compared with usual care, on health-related quality of life and health care utilization in people with COPD following hospitalization. | Randomized control study | Patients with acute exacerbation of COPD                                                                       | Australia | Outcomes                                   | FCNs has a fundamental role in reducing hospital re-admissions in exacerbation of COPD.                                                                       |
| 88 | Yates A. (2019)      | Basic continence assessment: what                                                                                                            | Describe incontinence, its impact on sufferers                                                                                                                                                                                       | Discussion paper         | Patients with incontinence                                                                                     | UK        | Clinical practice                          | FCNs promote health even in patients with incontinence disorders. Their role is                                                                               |

|    |                      |                                                                                                                                                                      |                                                                                                                                                    |                          |                             |         |                           |                                                                                                                             |
|----|----------------------|----------------------------------------------------------------------------------------------------------------------------------------------------------------------|----------------------------------------------------------------------------------------------------------------------------------------------------|--------------------------|-----------------------------|---------|---------------------------|-----------------------------------------------------------------------------------------------------------------------------|
|    | FCNs should know     | and the role of the FCN in this regard.                                                                                                                              |                                                                                                                                                    | ence disorder            |                             |         |                           | fundamental to improve patients' quality of life.                                                                           |
| 89 | Yingling C.T. (2017) | Building nurses' capacity to address health inequities: incorporating lesbian, gay, bisexual and transgender health content in a family nurse practitioner programme | To describe the experience of incorporating LGBT health content into the curriculum of FCN at a nursing college in the United States               | Discussion paper         | Community nursing students  | USA     | Advanced training program | The experience incorporating LGBT-specific content into the FCN program has proven positive for community nursing students. |
| 90 | Zimansky M. (2020)   | Effects of implementing a brief family nursing intervention with hospitalized oncology patients and their families in Germany: a quasi-experimental study            | To investigate the effects of implementing family nursing care on several psychological and physical outcomes of patients and their family members | Quasi-experimental study | Patients and family members | Germany | Outcomes                  | FCNs are the figures involved into the psychological support of cancer patients.                                            |
